# Supplementary figures and images for: Isocyanide-based three component reaction for synthesis of highly cyano substituted furan derivatives
Source: Royal Society of Chemistry journal article supplement (doi:10.1039/c5ra22293a), 2016-01-01

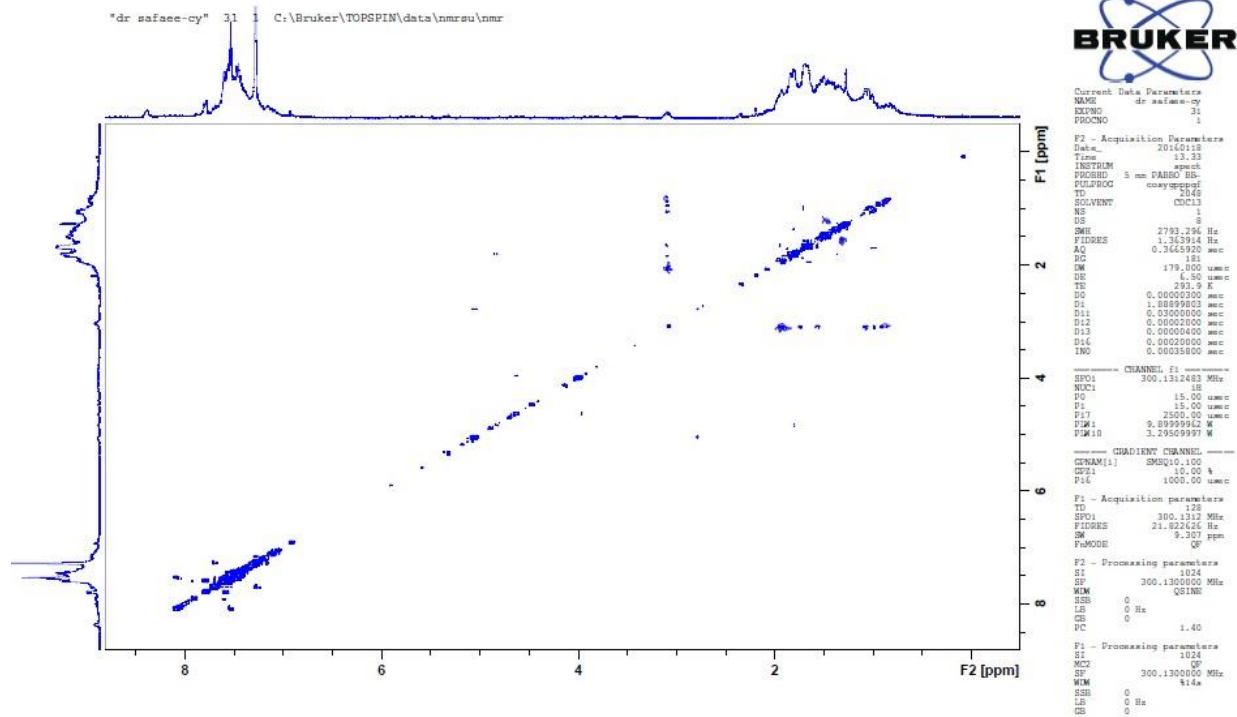

dr safaae-cy.40.1.1r  
C13APT CDCI3 (C:\Bruker\TOPSPIN) nmr su 70

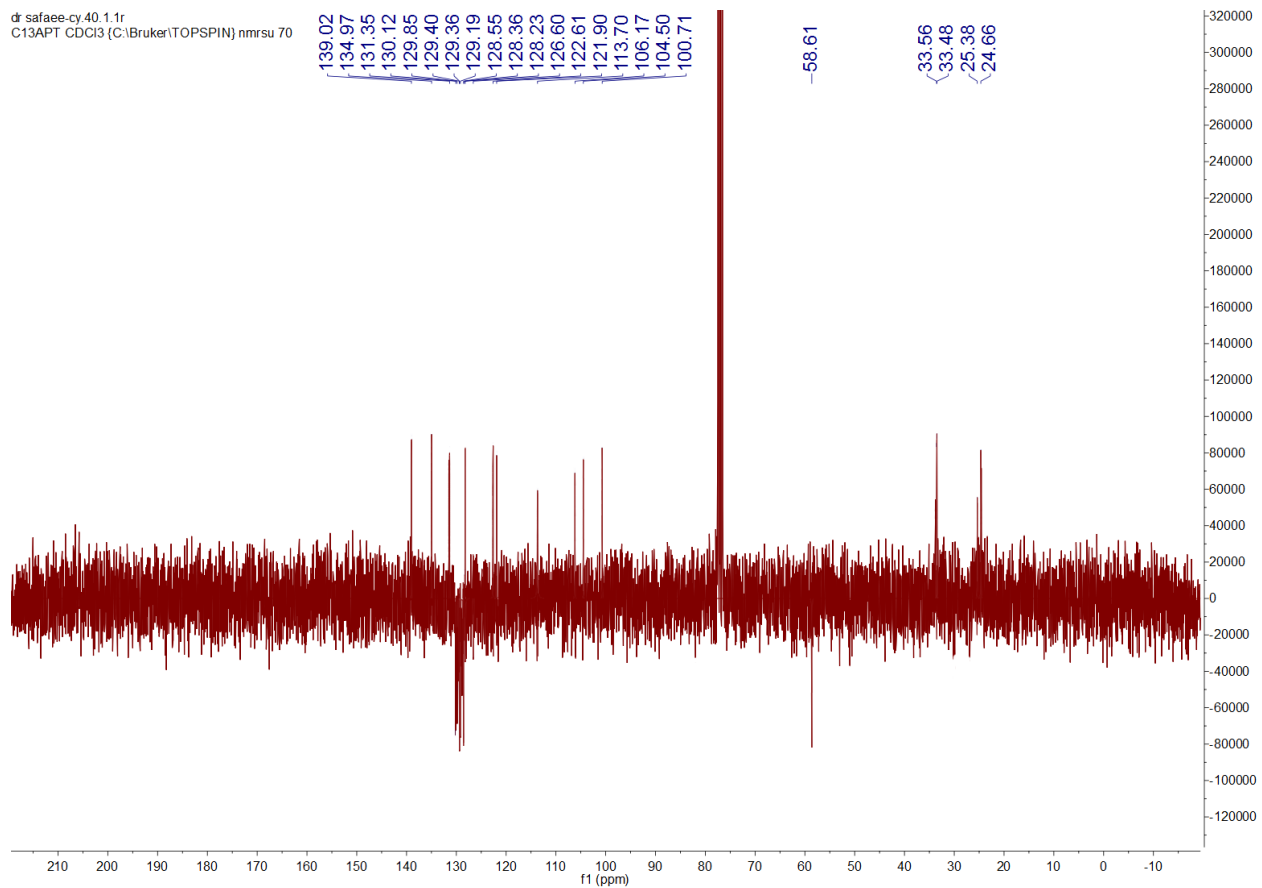

Supplement: c5ra22293a1.pdf [file c5ra22293a1.pdf]
